# Supplementary material
Source: PubMed Central journal article supplement (PMC1159144)
Supplement: JCI0524543.sd.pdf [file JCI0524543.sd.pdf]

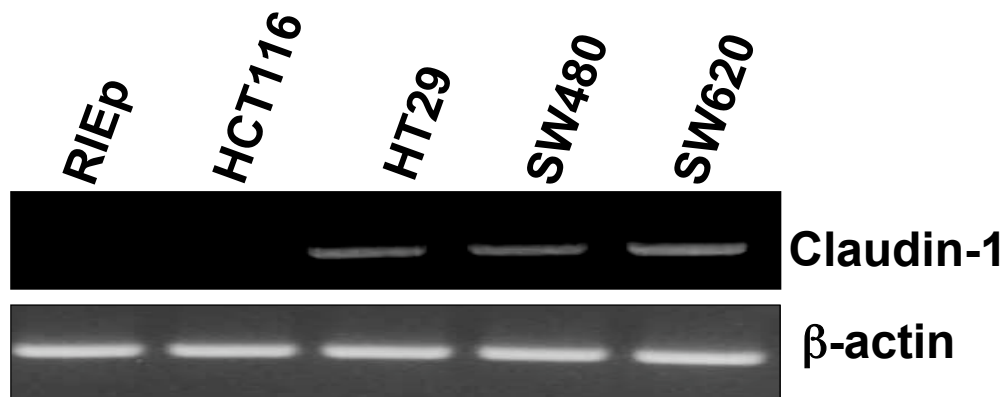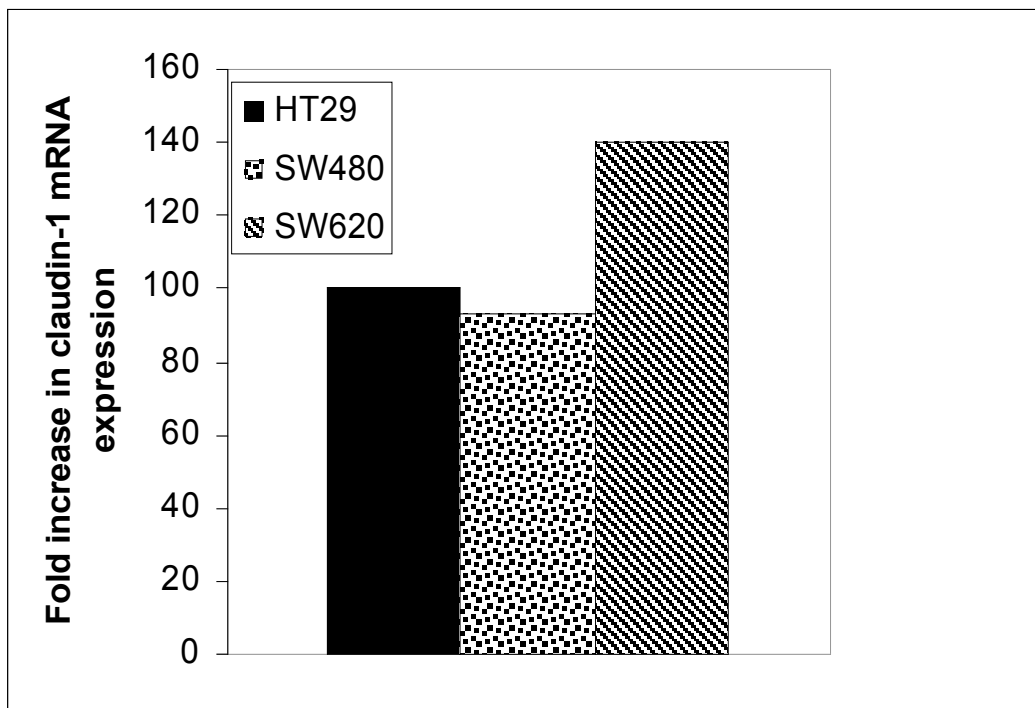

**Supplementary Figure 1:** Represents total RNA extracted from cell lines used for analysis of claudin-1 protein expression and subjected to semi-quantitative RT-PCR analysis using primers against human claudin-1. Primers for actin were used in the same reaction as internal control for amplification.

**SW620<sup>siRNA</sup>**

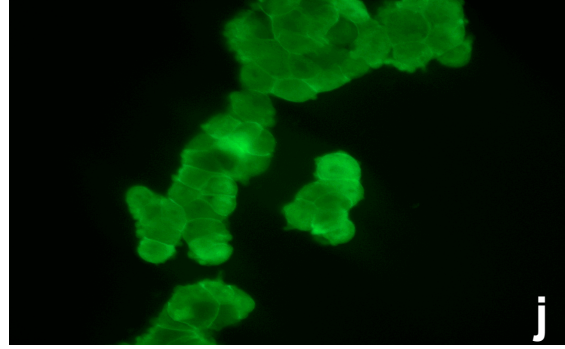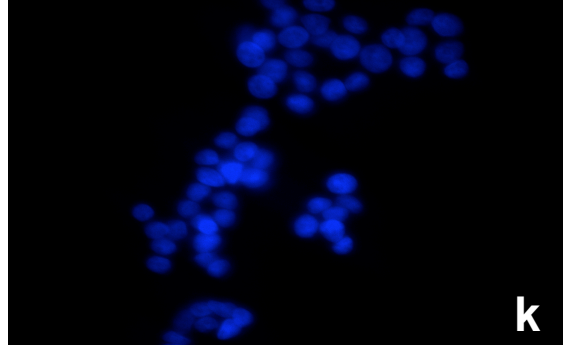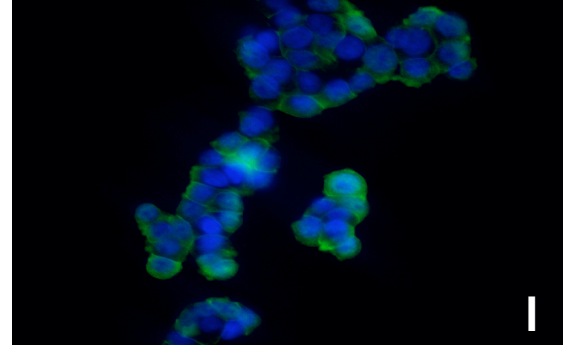

**SW620<sup>Control</sup>**

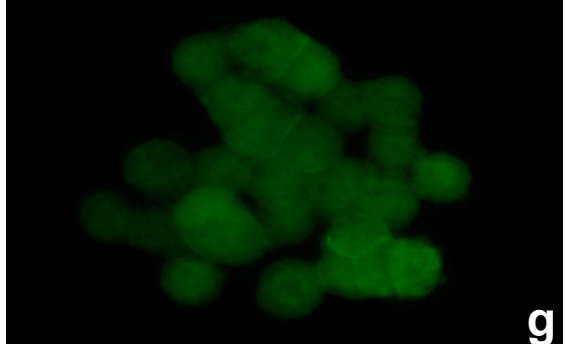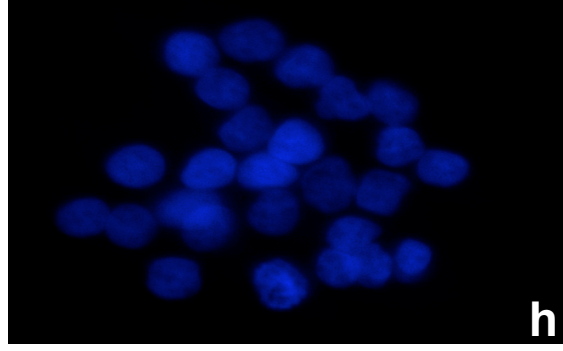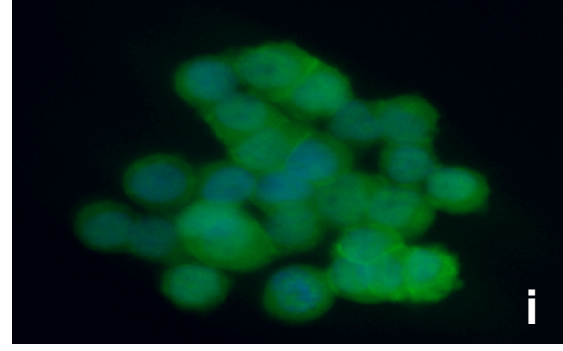

**SW480<sup>claudin-1</sup>**

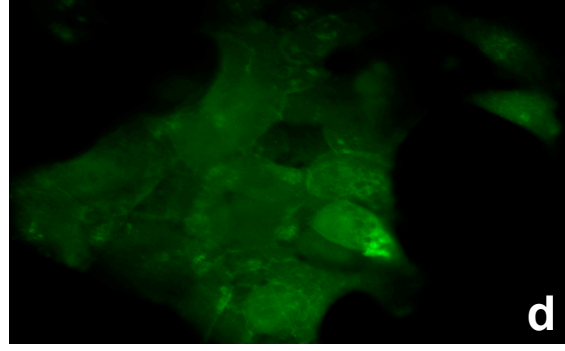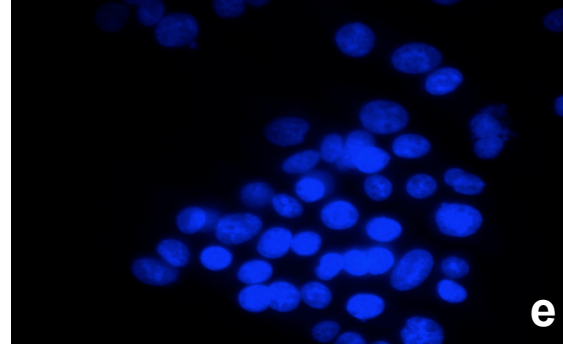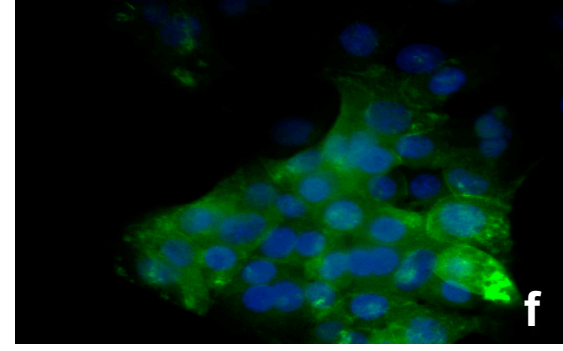

**SW480<sup>Control</sup>**

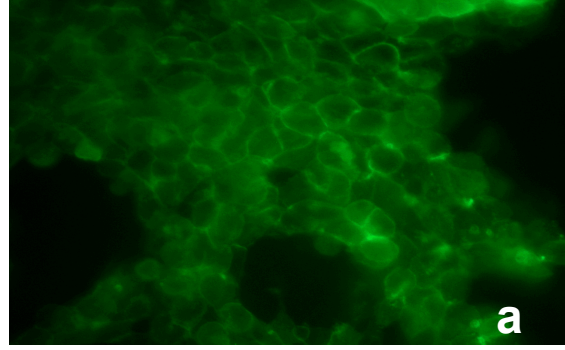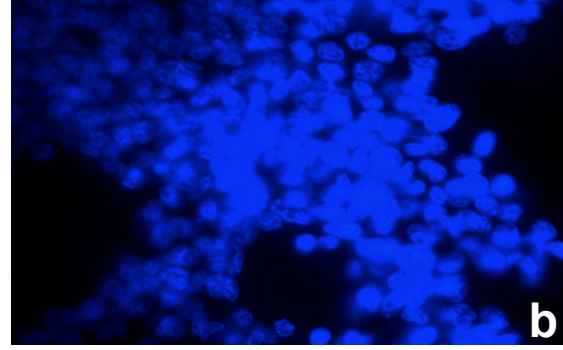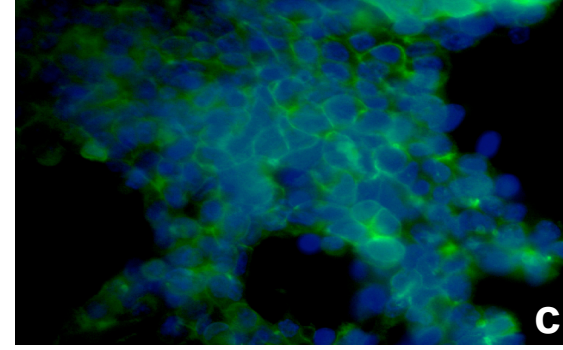

**Supplementary Figure 2:** Demonstrates co-localization of  $\beta$ -catenin (green) with DAPI (blue), which is confirmed by overlay (purple) in SW480<sup>control</sup>, SW480<sup>claudin-1</sup>, SW620<sup>control</sup> and SW620<sup>siRNA</sup> cells.
